# Supplementary material for: Nanosilver–Silica Composite: Prolonged Antibacterial Effects and Bacterial Interaction Mechanisms for Wound Dressings
Source: PubMed Central journal article supplement (PMC5618372; doi:10.3390/nano7090261), 2017-09-06
Supplement: nanomaterials-07-00261-s001.pdf [file nanomaterials-07-00261-s001.pdf]

Supplementary Material

# Nanosilver–Silica Composite: Prolonged Antibacterial Effects and Bacterial Interaction Mechanisms for Wound Dressings

Dina A. Mosselhy<sup>1,2,\*</sup>, Henrika Granbohm<sup>1</sup>, Ulla Hynönen<sup>3</sup>, Yanling Ge<sup>1</sup>, Airi Palva<sup>3</sup>, Katrina Nordström<sup>4</sup> and Simo-Pekka Hannula<sup>1</sup>

<sup>1</sup>Department of Chemistry and Materials Science, School of Chemical Engineering, Aalto University, 02150 Espoo, Finland

<sup>2</sup>Microbiological Unit, Fish Diseases Department, Animal Health Research Institute, Dokki, 12618 Giza, Egypt

<sup>3</sup>Department of Veterinary Biosciences, Division of Veterinary Microbiology and Epidemiology, University of Helsinki, P.O. Box 66, 00014 Helsinki, Finland

<sup>4</sup>Department of Bioproducts and Biosystems, School of Chemical Engineering, Aalto University, 02150 Espoo, Finland

\* Correspondence: [dina.mosselhy@aalto.fi](mailto:dina.mosselhy@aalto.fi); Tel.: +358-50-408-3533

X-ray diffraction (XRD) analyses of the nanosilver-silica (Ag–SiO<sub>2</sub>) composite and silica (SiO<sub>2</sub>) particles:

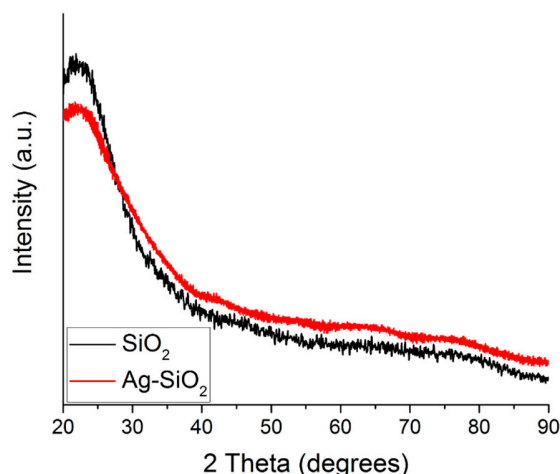

**Figure S1.** XRD patterns of the Ag–SiO<sub>2</sub> composite (heat-treated at 300 °C for 75 min) and SiO<sub>2</sub> particles.

Size distribution of the Ag NPs of the Ag–SiO<sub>2</sub> Composite

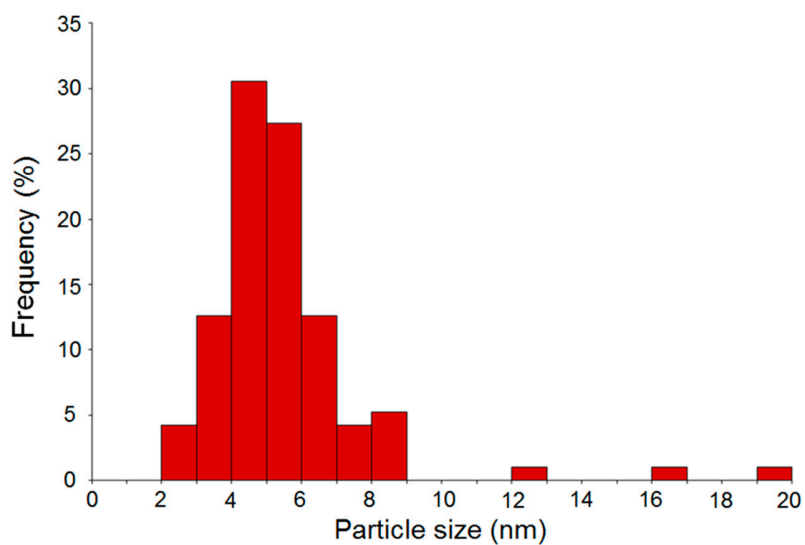

**Figure S2.** Size distribution histogram of the Ag NPs of the Ag-SiO<sub>2</sub> composite. The median size of the Ag NPs is 5 nm based on the analysis of 95 Ag NPs on multiple TEM images.

#### High-resolution transmission electron microscope (HRTEM) image of the Ag-SiO<sub>2</sub> composite

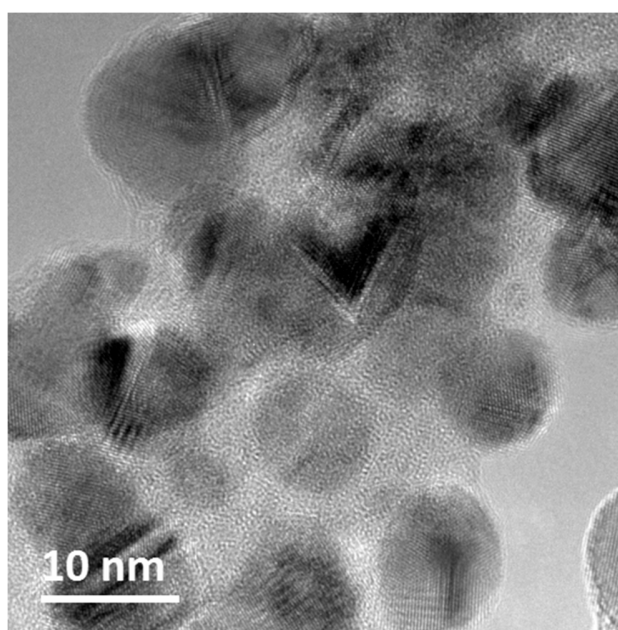

**Figure S3.** HRTEM image of the Ag-SiO<sub>2</sub> composite showing twinned and multi-grain Ag NPs.

**Table S1.** Prolonged antibacterial effects of Ag-SiO<sub>2</sub>-G.

| Inhibitor in MHB                    | OD at 600 nm (average ± SD) |                |               |                |               |                |
|-------------------------------------|-----------------------------|----------------|---------------|----------------|---------------|----------------|
|                                     | 24 h                        |                | 48 h          |                | 72 h          |                |
|                                     | MRSA                        | <i>E. coli</i> | MRSA          | <i>E. coli</i> | MRSA          | <i>E. coli</i> |
| None                                | 0.981 ± 0.001               | 0.756 ± 0.001  | 1.18 ± 0.002  | 0.822 ± 0.002  | 3             | 3              |
| Ag-SiO <sub>2</sub> -G <sup>1</sup> | 0.053 ± 0.001               | 0.051 ± 0.001  | 0.256 ± 0.001 | 0.182          | 1.604 ± 0.013 | 0.913 ± 0.002  |
| CSD <sup>2</sup>                    | 0.688 ± 0.002               | 0.496 ± 0.001  | 0.837 ± 0.002 | 0.33 ± 0.002   | 1.588 ± 0.016 | 0.957 ± 0.003  |
| G <sup>3</sup>                      | 0.938 ± 0.002               | 0.629 ± 0.002  | 1.282 ± 0.007 | 0.518 ± 0.002  | 3             | 3              |

<sup>1</sup>Ag-SiO<sub>2</sub> composite-impregnated gauze. <sup>2</sup>Commercial Ag-containing dressing. <sup>3</sup>Pristine gauze.
